# Supplementary material for: Naphthodithieno[3,2-b]thiophene-based semiconductors: synthesis, characterization, and device performance of field-effect transistors
Source: Royal Society of Chemistry journal article supplement (doi:10.1039/c4qo00021h), 2014-01-01
Supplement: c4qo00021h1.pdf [file c4qo00021h1.pdf]

## Naphthodithieno[3,2-*b*]thiophene-Based Semiconductors: Synthesis, Characterization, and the Device Performance of Field-Effect Transistors

Ji Zhang,<sup>a</sup> Zhaoguang Li,<sup>b</sup> Hui Xing,<sup>b</sup> Weifeng Zhang,<sup>a</sup> Lei Guo,<sup>b</sup> Yunqi Liu,<sup>a</sup> Man Shing Wong,<sup>\*b</sup> and Gui Yu<sup>\*a</sup>

<sup>a</sup>Beijing National Laboratory for Molecular Sciences, Institute of Chemistry, Chinese Academy of Sciences, Beijing 100190, P. R. China.

<sup>b</sup>Institute of Molecular Functional Materials, Department of Chemistry, and Institute of Advanced Materials, Hong Kong Baptist University, Kowloon Tong, Hong Kong SAR, P. R. China.

E-mail: yugui@iccas.ac.cn; mswong@hkbu.edu.hk

---

### Experimental:

#### Materials and method:

All the solvents were purified by the standard methods. <sup>1</sup>H NMR spectra were recorded using a Bruker advanced-III 400 NMR spectrometer with a reference of the residual CHCl<sub>3</sub> 7.26 ppm. <sup>13</sup>C NMR spectra were recorded using a Bruker advanced-III 400 NMR spectrometer with a reference of the residual CHCl<sub>3</sub> 77.15 ppm. Mass spectrometer (MS) measurements were carried out using fast atom bombardment (FAB) on the API ASTAR Pulsar I Hybrid Mass Spectrometer or matrix-assisted laser desorption ionization-time-of-flight (MALDI-TOF) technique. Thermal stabilities were determined by thermal gravimetric analyzer (PE-TGA6) with a heating rate of 20 °C/min under N<sub>2</sub>. All absorption measurements were performed with a Varian Cary 100 Scan Spectrophotometer in dry DCM. The X-ray diffraction (XRD) measurements were carried out using D/max 2500 X-Ray Diffractometer. The atomic force microscopy (AFM) measurements were carried out using Bruke Multimode 8, tapping mode.

**Synthesis Procedure:**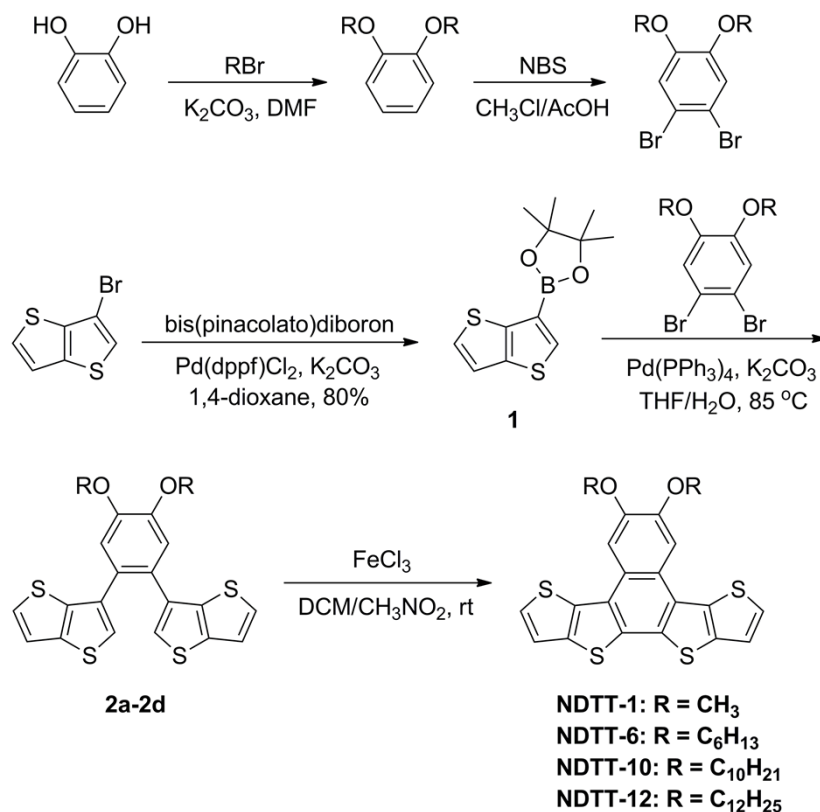

**Scheme S1** Synthetic routes for naphthodithieno[3,2-b]thiophene derivatives, **NDTT-n** ( $n = 1, 6, 10,$  and  $12$ )

**Synthesis of 2-(4,4,5,5-tetramethyl)-1,3,2-dioxaborolan-2-yl-thino[3,2-b]thiophene (1)**

To a solution of 3-bromo-thieno[3,2-b]thiophene (2.5g, 11.41 mmol), bis(pinacolato)diboron (4.3g, 17.12 mmol), KOAc (5.6 g, 57.1 mmol) in 1,4-dioxane (50 mL) was added Pd(dppf)Cl<sub>2</sub> (100 mg). The mixture was refluxed at 80 °C overnight under N<sub>2</sub>. After cooled to room temperature, extracted with ethyl acetate (50 mL × 3), washed with brine, and dried over anhydrous Na<sub>2</sub>SO<sub>4</sub>, the solvent was removed by rotary evaporation. The residue was purified by silica gel column chromatography affording the title product as a light yellow solid (1.8 g, 60%). <sup>1</sup>H NMR (400 MHz, CDCl<sub>3</sub>) δ: 7.95 (d,  $J = 1.6$  Hz, 1H), 7.42 (dd,  $J = 5.2$  Hz,  $J = 1.6$  Hz 1H), 7.27 (d,  $J = 5.2$  Hz, 1H), 1.38 (s, 12H). <sup>13</sup>C NMR (100 MHz, CDCl<sub>3</sub>) δ: 144.5, 139.2, 138.4, 128.1, 118.9, 84.1, 24.9.

**Synthesis of the compound 2a**

To a solution of the compound **1** (2.12 g, 8 mmol), 1,2-dibromo-4,5-dimethoxybenzene (0.59 g, 2 mmol), K<sub>2</sub>CO<sub>3</sub> (1.1 g, 8 mmol) in THF/H<sub>2</sub>O (40 mL/4 mL) was added Pd(PPh<sub>3</sub>)<sub>4</sub> (100 mg). The mixture was refluxed at 85 °C overnight under N<sub>2</sub>. After cooled to room temperature, extracted with DCM (50 mL × 3), washed with brine, and dried over anhydrous Na<sub>2</sub>SO<sub>4</sub>, the solvent was removed by rotary evaporation and the residue was purified by silica gel column chromatography affording the

desired product as a white solid (0.41 g, 50%).  $^1\text{H}$  NMR (400 MHz,  $\text{CDCl}_3$ )  $\delta$ : 7.28 (dd,  $J = 5.6$  Hz, 1.6 Hz, 2H), 7.21 (s, 2H), 7.17 (d,  $J = 5.6$  Hz, 2H), 7.03 (d,  $J = 1.6$  Hz, 2H), 3.97 (s, 6H).  $^{13}\text{C}$  NMR (100 MHz,  $\text{CDCl}_3$ )  $\delta$ : 148.6, 140.0, 138.4, 133.5, 127.4, 126.5, 124.9, 119.5, 112.8, 56.1. HRMS (MALDI-TOF): calcd for  $\text{C}_{20}\text{H}_{14}\text{O}_2\text{S}_4$ : 413.9871; found: 413.9896.

#### **Synthesis of the compound 2b**

To a solution of the compound **1** (2.12 g, 8 mmol), 1,2-dibromo-4,5-dihexyloxybenzene (0.87 g, 2 mmol),  $\text{K}_2\text{CO}_3$  (1.1 g, 8 mmol) in THF/ $\text{H}_2\text{O}$  (40 mL/4 mL) was added  $\text{Pd}(\text{PPh}_3)_4$  (100 mg). The mixture was refluxed at 85 °C overnight under  $\text{N}_2$ . After cooled to room temperature, extracted with DCM (50 mL  $\times$  3), washed with brine, and dried over anhydrous  $\text{Na}_2\text{SO}_4$ , the solvent was removed by rotary evaporation and the residue was purified by silica gel column chromatography affording the desired product as a white solid (0.66 g, 60%).  $^1\text{H}$  NMR (400 MHz,  $\text{CDCl}_3$ )  $\delta$ : 7.27 (dd,  $J = 5.6$  Hz, 1.6 Hz, 2H), 7.26 (s, 2H), 7.18 (d,  $J = 5.2$  Hz, 2H), 7.03 (d,  $J = 1.6$  Hz, 2H), 4.13 (t,  $J = 6.6$  Hz, 4H), 1.96–1.89 (m, 4H), 1.61–1.52 (m, 4H), 1.46–1.38 (m, 8H), 1.00–0.94 (m, 6H).  $^{13}\text{C}$  NMR (100 MHz,  $\text{CDCl}_3$ )  $\delta$ : 148.8, 140.2, 138.4, 133.8, 127.4, 126.5, 124.9, 119.5, 114.9, 69.4, 31.7, 29.3, 25.8, 22.8, 14.2. HRMS (MALDI-TOF): calcd for  $\text{C}_{30}\text{H}_{34}\text{O}_2\text{S}_4$ : 554.1436; found: 554.1440.

#### **Synthesis of the compound 2c**

To a solution of the compound **1** (2.12 g, 8 mmol), 1,2-dibromo-4,5-didecyloxybenzene (1.1 g, 2 mmol),  $\text{K}_2\text{CO}_3$  (1.1 g, 8 mmol) in THF/ $\text{H}_2\text{O}$  (40 mL/4 mL) was added  $\text{Pd}(\text{PPh}_3)_4$  (100 mg). The mixture was refluxed at 85 °C overnight under  $\text{N}_2$ . After cooled to room temperature, extracted with DCM (50 mL  $\times$  3), washed with brine, and dried over anhydrous  $\text{Na}_2\text{SO}_4$ , the solvent was removed by rotary evaporation and the residue was purified by silica gel column chromatography affording the desired product as a white solid (0.93 g, 70%).  $^1\text{H}$  NMR (400 MHz,  $\text{CDCl}_3$ )  $\delta$ : 7.27 (dd,  $J = 5.2$  Hz, 1.6 Hz, 2H), 7.20 (s, 2H), 7.17 (d,  $J = 5.2$  Hz, 2H), 7.00 (d,  $J = 1.6$  Hz, 2H), 4.10 (t,  $J = 6.4$  Hz, 4H), 1.90–1.84 (m, 4H), 1.52–1.45 (m, 4H), 1.38–1.23 (m, 24H), 0.90–0.85 (m, 6H).  $^{13}\text{C}$  NMR (100 MHz,  $\text{CDCl}_3$ )  $\delta$ : 148.7, 140.1, 138.3, 133.7, 127.4, 126.5, 124.8, 119.4, 114.8, 69.3, 32.0, 29.7, 29.6, 29.5, 29.4, 29.2, 26.1, 22.8, 14.2. HRMS (MALDI-TOF): calcd for  $\text{C}_{38}\text{H}_{50}\text{O}_2\text{S}_4$ : 666.2688; found: 666.2686.

#### **Synthesis of the compound 2d**

To a solution of the compound **1** (2.12 g, 8 mmol), 1,2-dibromo-4,5-didodecyloxybenzene (1.2 g, 2 mmol),  $\text{K}_2\text{CO}_3$  (1.1 g, 8 mmol) in THF/ $\text{H}_2\text{O}$  (40 mL/4 mL) was added  $\text{Pd}(\text{PPh}_3)_4$  (100 mg). The mixture was refluxed at 85 °C overnight under  $\text{N}_2$ . After cooled to room temperature, extracted with DCM (50 mL  $\times$  3), washed with brine, and dried over anhydrous  $\text{Na}_2\text{SO}_4$ , the solvent was removed by rotary evaporation and the residue was purified by silica gel column chromatography affording the desired product as a white solid (0.86 g, 60%).  $^1\text{H}$  NMR (400 MHz,  $\text{CDCl}_3$ )  $\delta$ : 7.28 (dd,  $J = 5.6$  Hz, 1.6 Hz, 2H), 7.20 (s, 2H), 7.18 (d,  $J = 5.2$  Hz, 2H), 6.99 (d,  $J = 1.6$  Hz, 2H), 4.09 (t,  $J = 6.6$  Hz, 4H), 1.91–1.84 (m, 4H), 1.53–1.46 (m, 4H), 1.40–1.23 (m, 32H), 0.93–0.87 (m, 6H).  $^{13}\text{C}$  NMR (100 MHz,  $\text{CDCl}_3$ )  $\delta$ : 148.7, 140.2, 138.3, 133.7, 127.4, 126.4, 124.8, 119.5, 114.8, 69.3, 32.0, 29.8, 29.71, 29.70,

29.5, 29.4, 29.3, 26.1, 22.8, 14.2. HRMS (MALDI-TOF): calcd for  $C_{42}H_{58}O_2S_4$ : 722.3314; found: 722.3283.

#### **Synthesis of the compound NDTT-1**

To a solution of **2a** (0.414 g, 1 mmol) in dry DCM (150 mL) was added a solution of  $FeCl_3$  (0.341 g, 2.1 mmol) in nitromethane (15 mL) dropwise. After stirred at room temperature for 1 h, methanol (30 mL) was added, and the solvent was removed by rotary evaporation and the residue was purified by silica gel column chromatography affording the desired product as a light gray solid (0.165 g, 40%).  $^1H$  NMR (400 MHz,  $CDCl_3$ )  $\delta$ : 7.63 (s, 2H), 7.57 (d,  $J = 5.2$  Hz, 2H), 7.43 (d,  $J = 5.2$  Hz, 2H), 4.14 (s, 6H),  $^{13}C$  NMR (100 MHz,  $CDCl_3$ )  $\delta$ : 148.8, 136.3, 134.7, 133.5, 127.4, 126.3, 121.1, 120.1, 104.6, 55.9. HRMS (MALDI-TOF): calcd for  $C_{20}H_{12}O_2S_4$ : 411.9715; found: 411.9721. calc. for  $C_{20}H_{12}O_2S_4$ : C 58.22, H 2.93; found: C 58.18, H 3.04.

#### **Synthesis of the compound NDTT-6**

To a solution of **2b** (0.55 g, 1 mmol) in dry DCM (150 mL) was added a solution of  $FeCl_3$  (0.341 g, 2.1 mmol) in nitromethane (15 mL) dropwise. After stirred at room temperature for 1 h, methanol (30 mL) was added, and the solvent was removed by rotary evaporation and the residue was purified by silica gel column chromatography affording the desired product as a light yellow solid (0.24 g, 43%).  $^1H$  NMR (400 MHz,  $CDCl_3$ )  $\delta$ : 7.64 (s, 2H), 7.54 (d,  $J = 5.4$  Hz, 2H), 7.38 (d,  $J = 5.4$  Hz, 2H), 4.26 (t,  $J = 6.6$  Hz, 4H), 2.04–1.97 (m, 4H), 1.66–1.59 (m, 4H), 1.49–1.39 (m, 8H), 1.00–0.94 (m, 6H).  $^{13}C$  NMR (100 MHz,  $CDCl_3$ )  $\delta$ : 148.8, 136.1, 134.7, 133.3, 127.3, 126.3, 121.1, 120.0, 106.2, 69.0, 31.8, 29.2, 25.9, 22.7, 14.1. HRMS (MALDI-TOF): calcd for  $C_{30}H_{32}O_2S_4$ : 552.1279; found: 552.1280. calcd. for  $C_{30}H_{32}O_2S_4$ : C 65.18, H 5.83; found: C 65.07, H 5.89.

#### **Synthesis of the compound NDTT-10**

To a solution of **2c** (0.66 g, 1 mmol) in dry DCM (150 mL) was added a solution of  $FeCl_3$  (0.341 g, 2.1 mmol) in nitromethane (15 mL) dropwise. After stirred at room temperature for 1 h, methanol (30 mL) was added, and the solvent was removed by rotary evaporation and the residue was purified by silica gel column chromatography affording the desired product as a light yellow solid (0.32 g, 48%).  $^1H$  NMR (400 MHz,  $CDCl_3$ )  $\delta$ : 7.75 (s, 2H), 7.57 (d,  $J = 5.2$  Hz, 2H), 7.43 (d,  $J = 5.2$  Hz, 2H), 4.30 (t,  $J = 6.6$  Hz, 4H), 2.04–1.98 (m, 4H), 1.66–1.58 (m, 4H), 1.49–1.26 (m, 24H), 0.92–0.85 (m, 6H).  $^{13}C$  NMR (100 MHz,  $CDCl_3$ )  $\delta$ : 148.9, 136.2, 134.8, 133.4, 127.4, 126.4, 121.2, 120.1, 106.4, 69.1, 32.00, 29.7, 29.6, 29.5, 29.4, 29.1, 26.2, 22.8, 14.2. HRMS (MALDI-TOF): calcd for  $C_{38}H_{48}O_2S_4$ : 664.2531; found: 664.2587. calcd. for  $C_{38}H_{48}O_2S_4$ : C 68.63, H 7.27; found: C 68.52, H 7.28.

#### **Synthesis of the compound NDTT-12**

To a solution of **2d** (0.72 g, 1 mmol) in dry DCM (150 mL) was added a solution of  $FeCl_3$  (0.341 g, 2.1 mmol) in nitromethane (15 mL) dropwise. After stirred at room temperature for 1 h, methanol (30 mL) was added, and the solvent was removed by rotary evaporation and the residue was purified by silica gel column chromatography affording the desired product as light yellow solid (0.28 g, 40%).  $^1H$

NMR (400 MHz, CDCl<sub>3</sub>)  $\delta$ : 7.79 (s, 2H), 7.58 (d,  $J$  = 5.2 Hz, 2H), 7.45 (d,  $J$  = 5.2 Hz, 2H), 4.31 (t,  $J$  = 6.6 Hz, 4H), 2.05–1.98 (m, 4H), 1.66–1.59 (m, 4H), 1.49–1.41 (m, 4H), 1.39–1.24 (m, 28H), 0.91–0.85 (m, 6H). <sup>13</sup>C NMR (100 MHz, CDCl<sub>3</sub>)  $\delta$ : 149.0, 136.3, 134.8, 133.5, 127.4, 126.4, 121.3, 120.1, 106.6, 69.2, 32.0, 29.8, 29.7, 29.6, 29.5, 29.4, 29.2, 26.2, 22.7, 14.1. HRMS (MALDI-TOF): calcd for C<sub>42</sub>H<sub>56</sub>O<sub>2</sub>S<sub>4</sub>: 720.3158; found: 720.3160. calcd. for C<sub>42</sub>H<sub>56</sub>O<sub>2</sub>S<sub>4</sub>: C 69.95, H 7.83; found: C 70.34, H 7.79.

The <sup>1</sup>H NMR and <sup>13</sup>C NMR spectra for intermediates and **NDTT-n** (n = 1, 6, 10, and 12) are shown as follows.

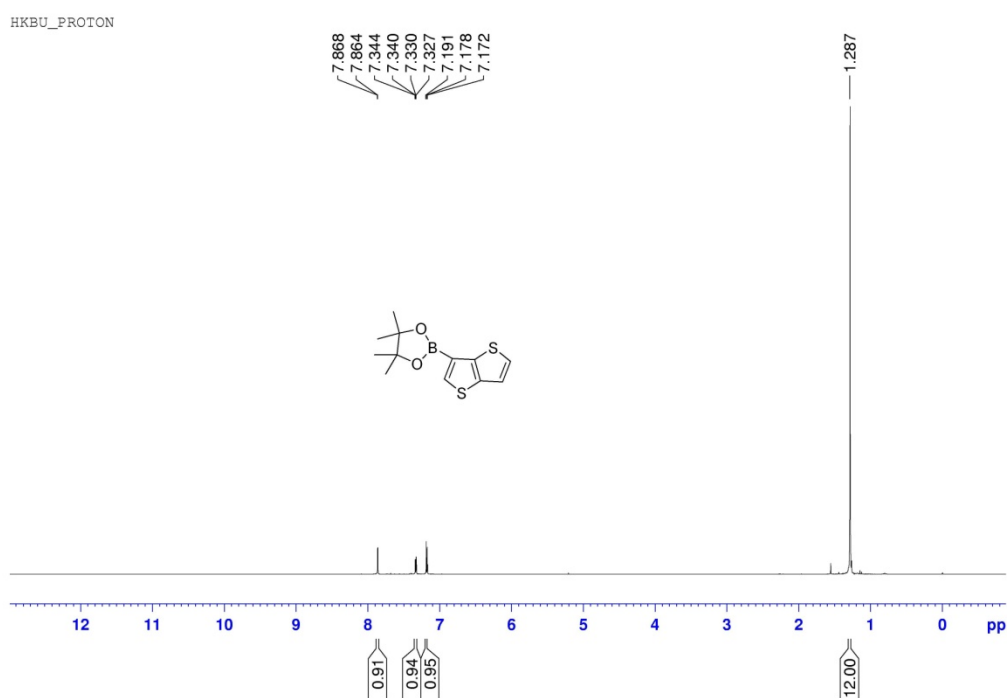

<sup>1</sup>H NMR spectrum of the compound **1**.

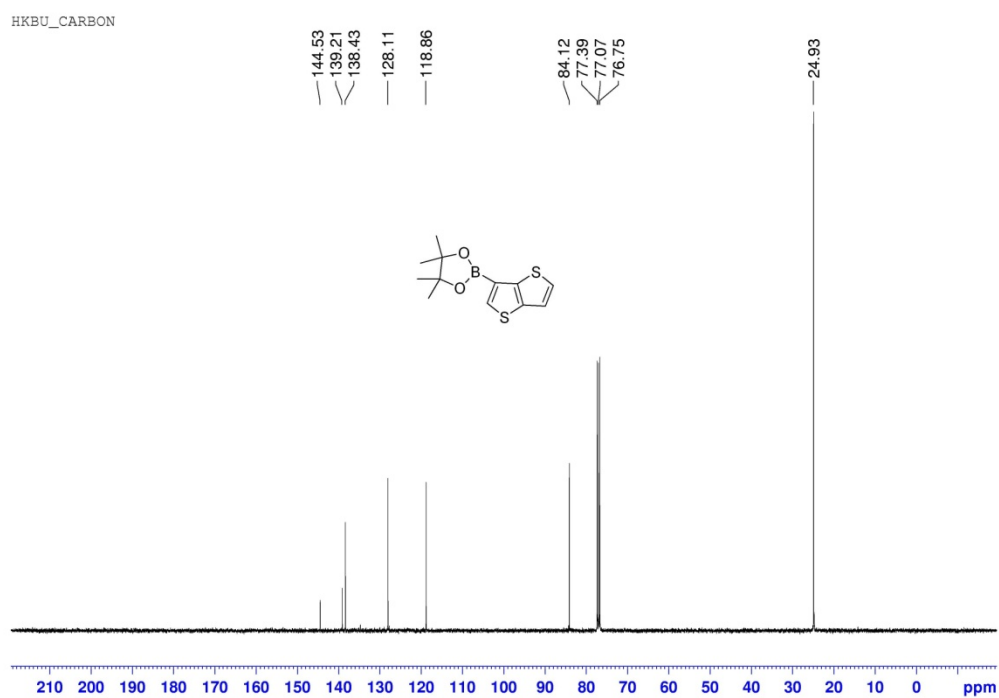

$^{13}\text{C}$  NMR spectrum of the compound **1**.

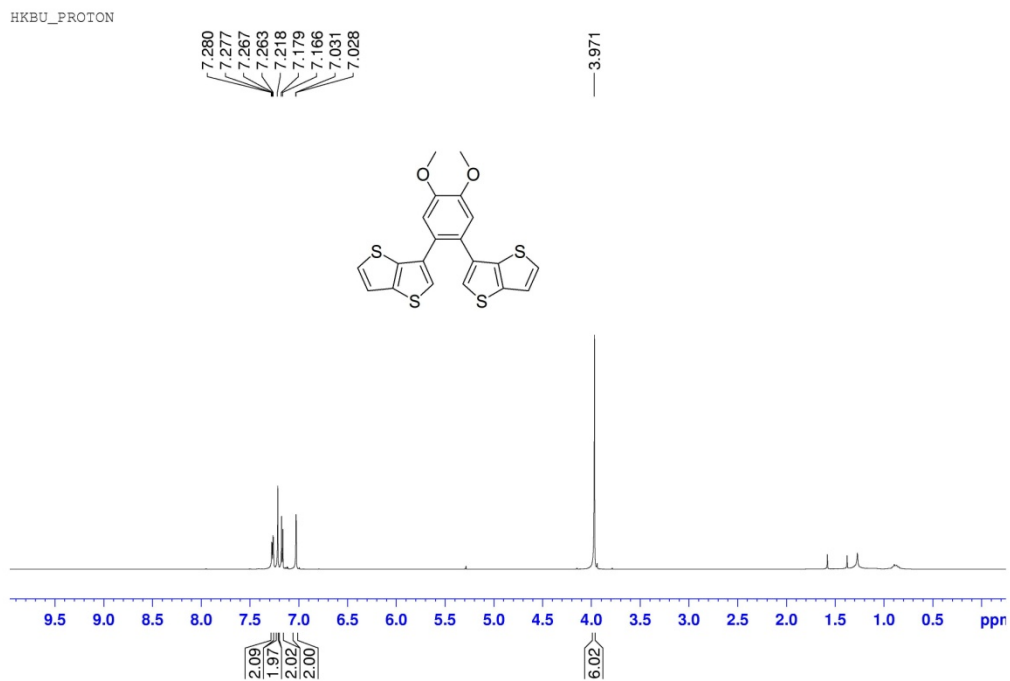

$^1\text{H}$  NMR spectrum of the compound **2a**.

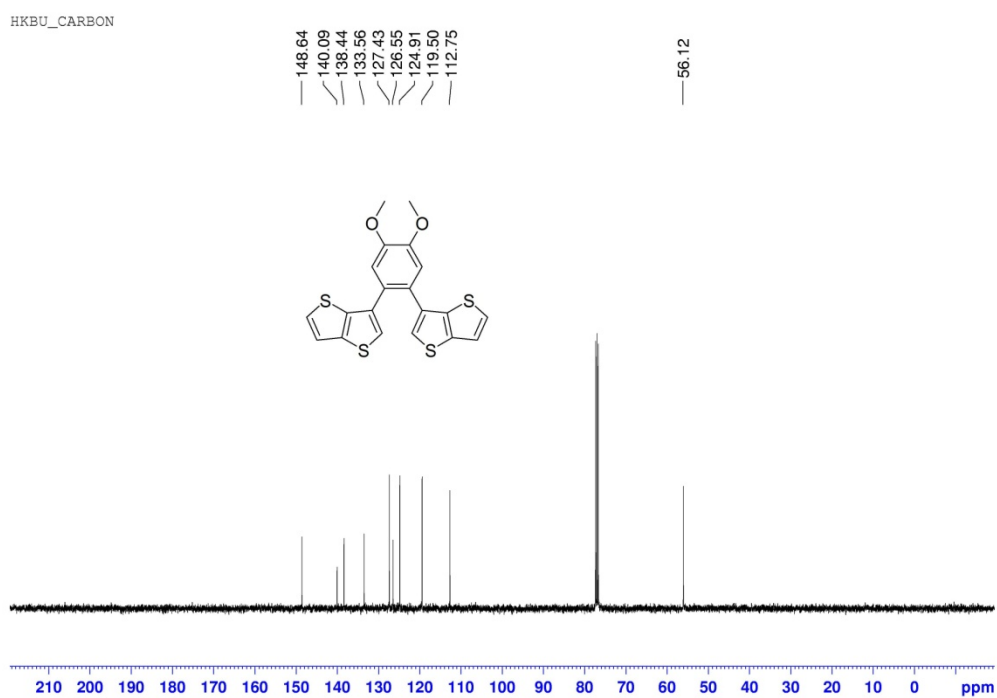

$^{13}\text{C}$  NMR spectrum of the compound **2a**.

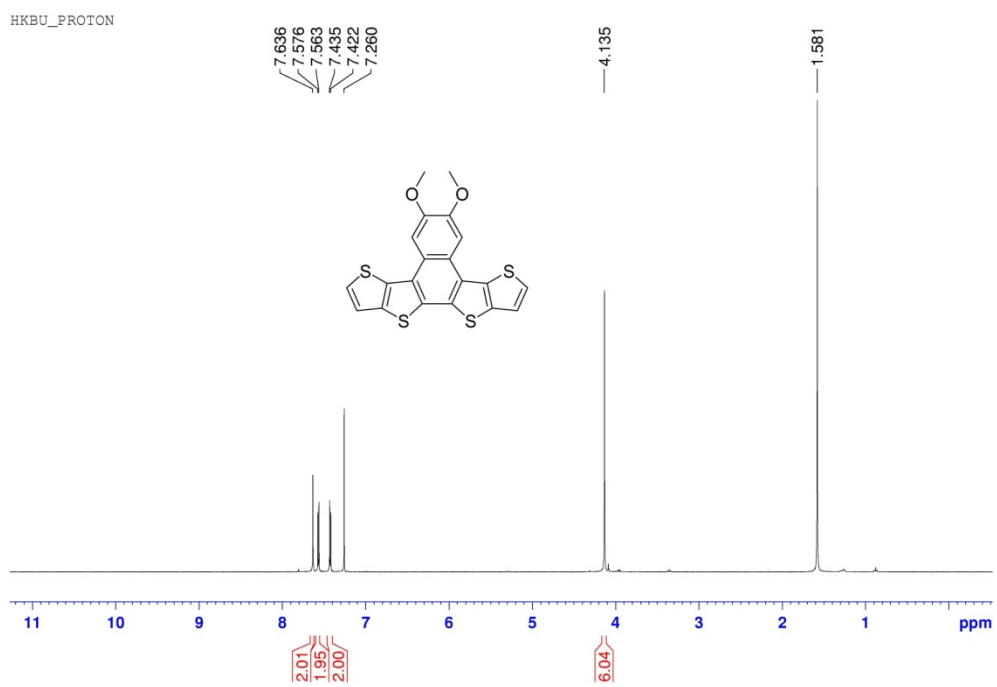

$^1\text{H}$  NMR spectrum of **NDTT-1**.

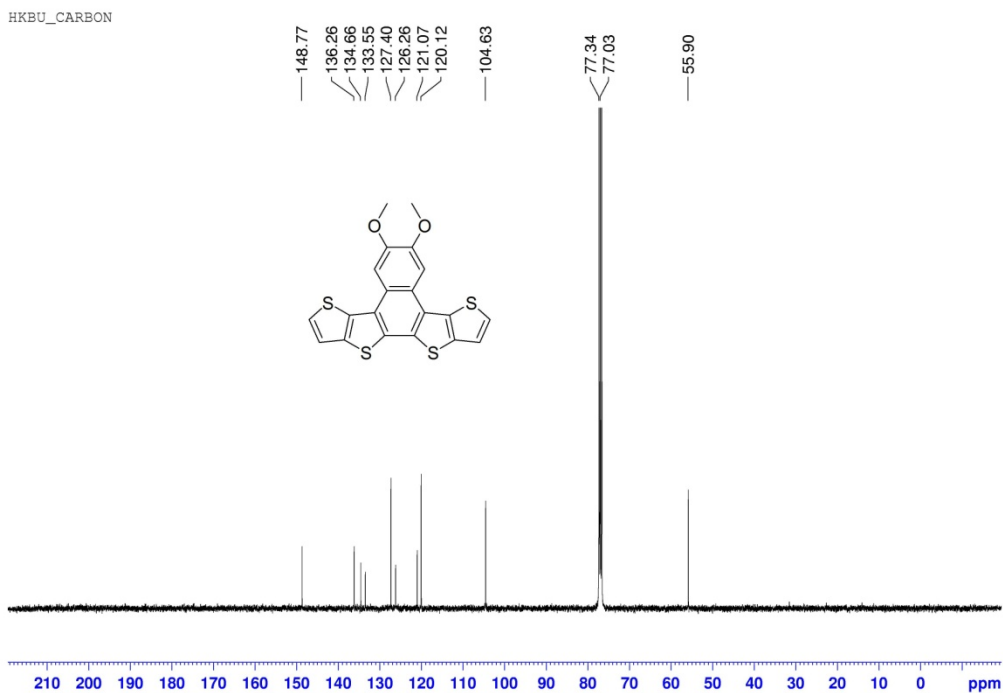

<sup>13</sup>C NMR spectrum of NDTT-1.

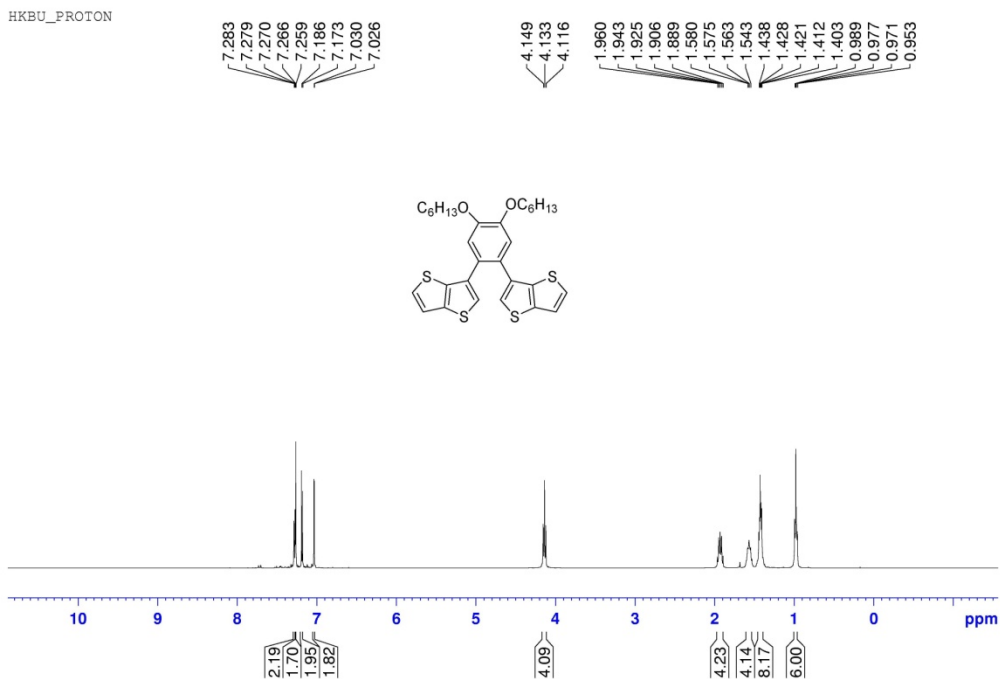



<sup>1</sup>H NMR spectrum of the compound **2b**.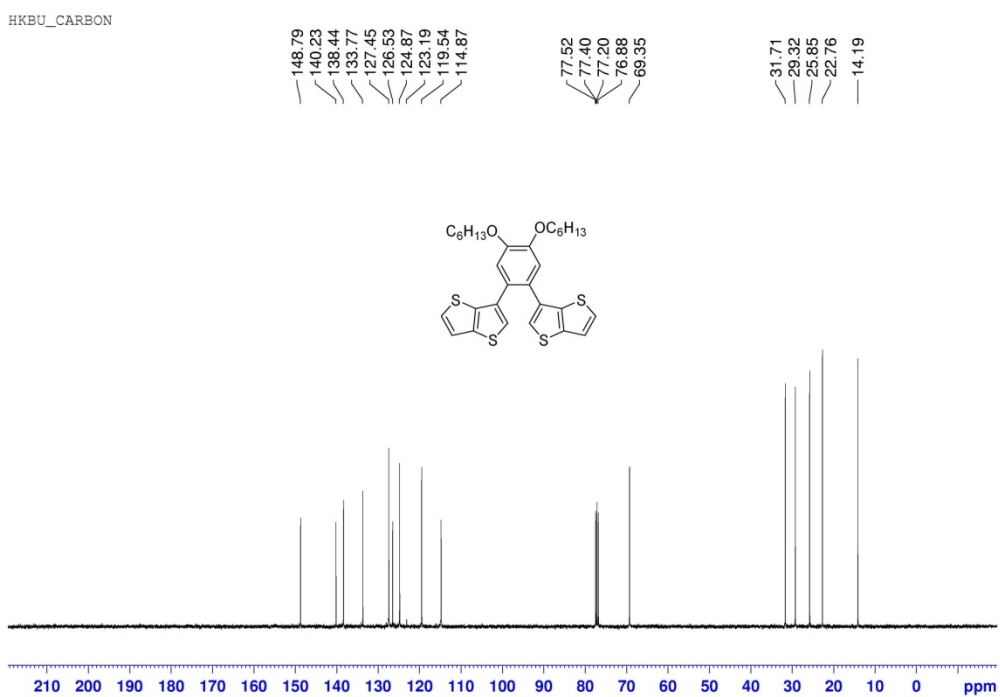<sup>13</sup>C NMR spectrum of the compound **2b**.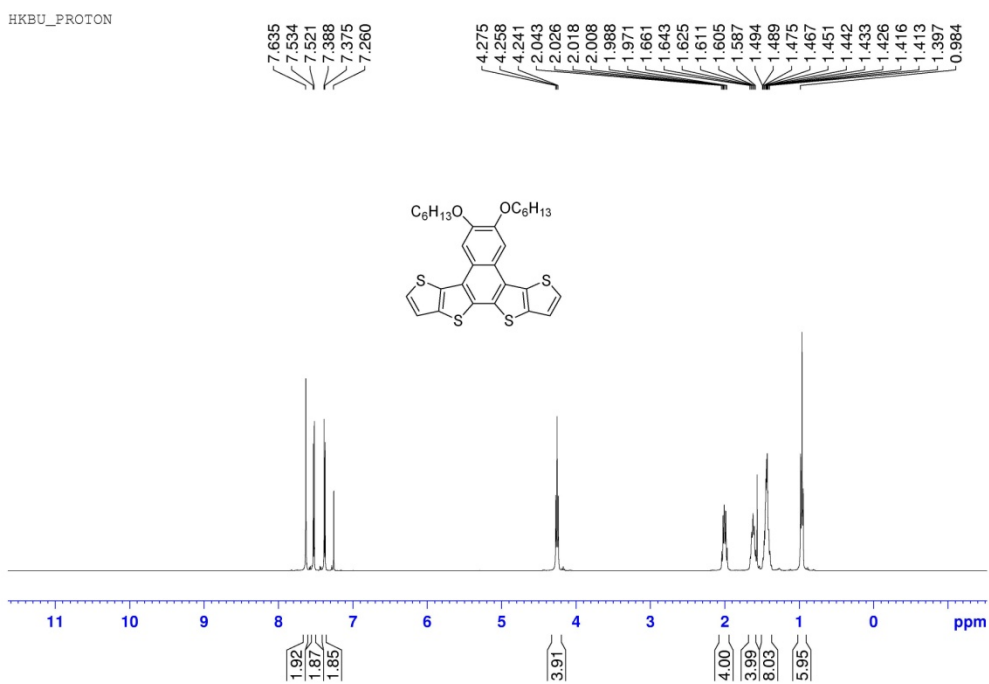

<sup>1</sup>H NMR spectrum of the compound **NDTT-6**.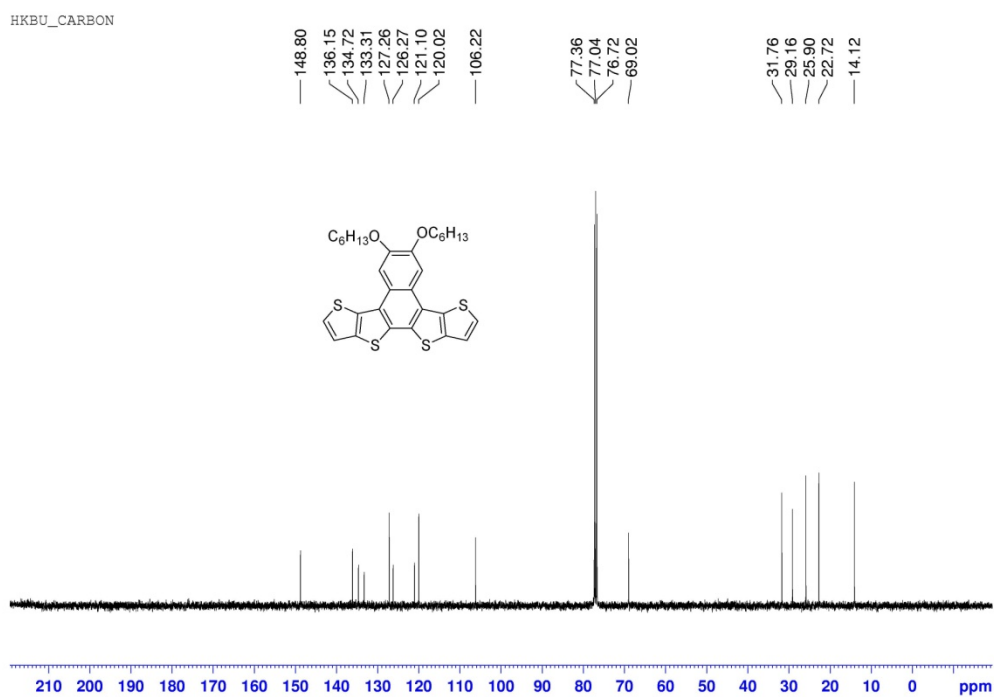<sup>13</sup>C NMR spectrum of the compound **NDTT-6**.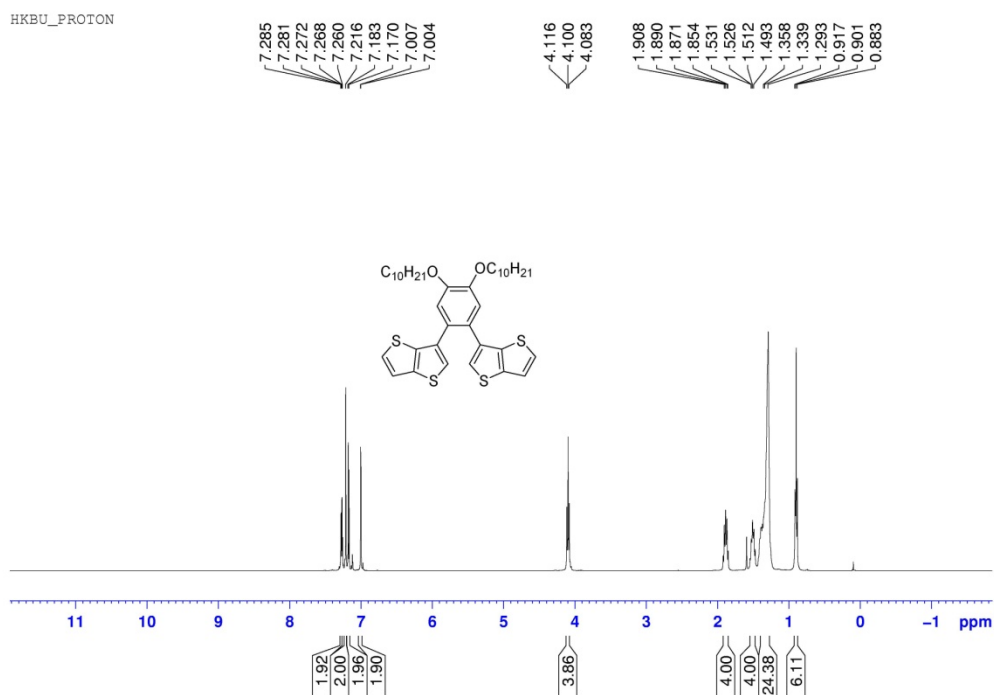

<sup>1</sup>H NMR spectrum of the compound **2c**.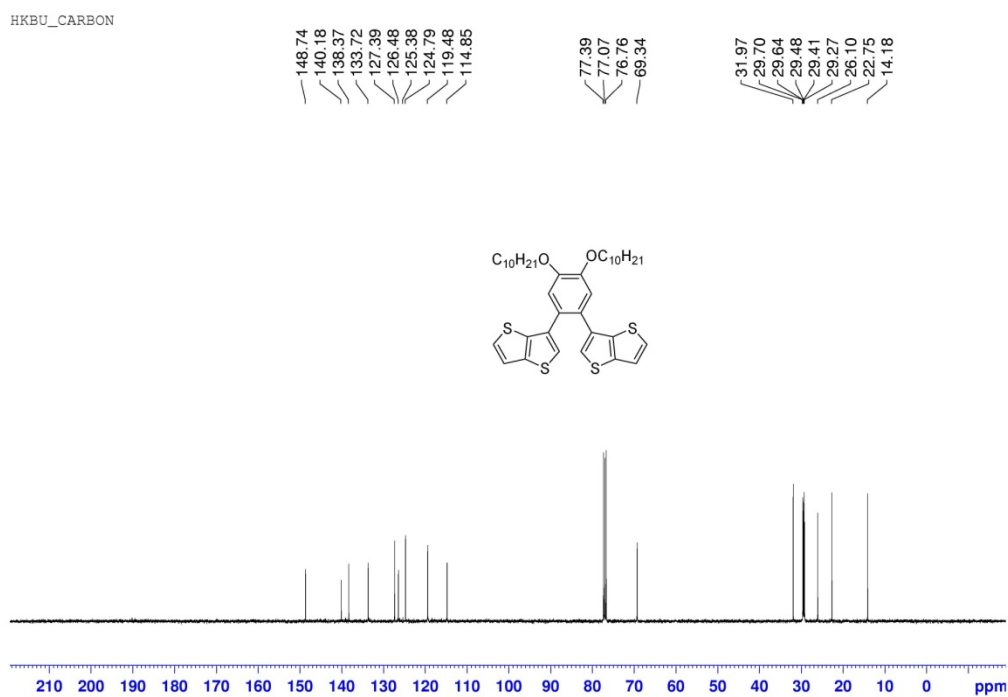<sup>13</sup>C NMR spectrum of the compound **2c**.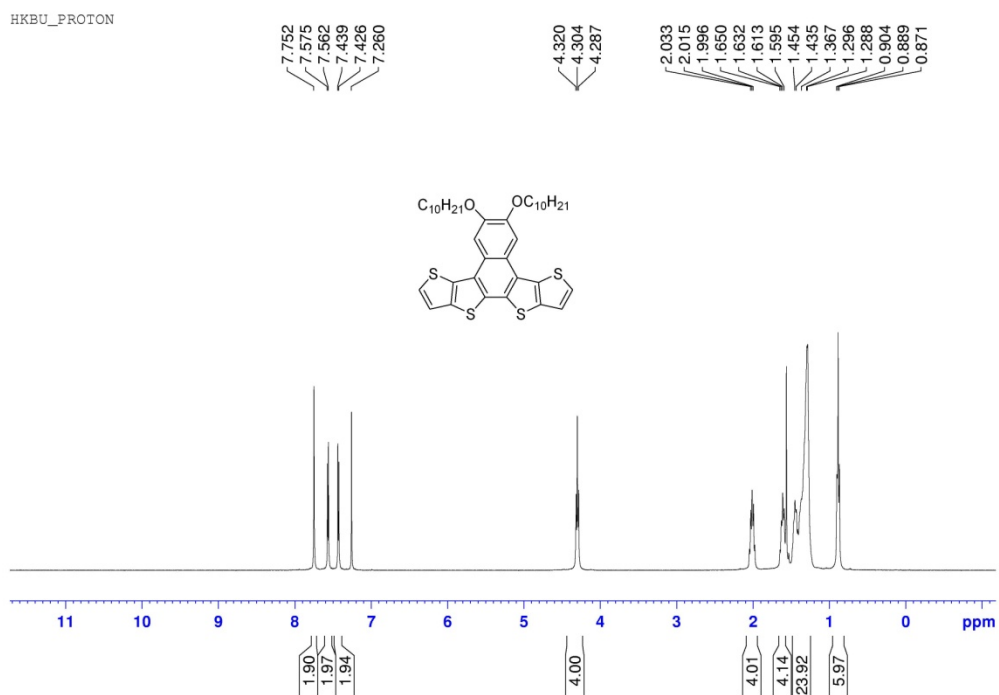

<sup>1</sup>H NMR spectrum of the compound NDTT-10.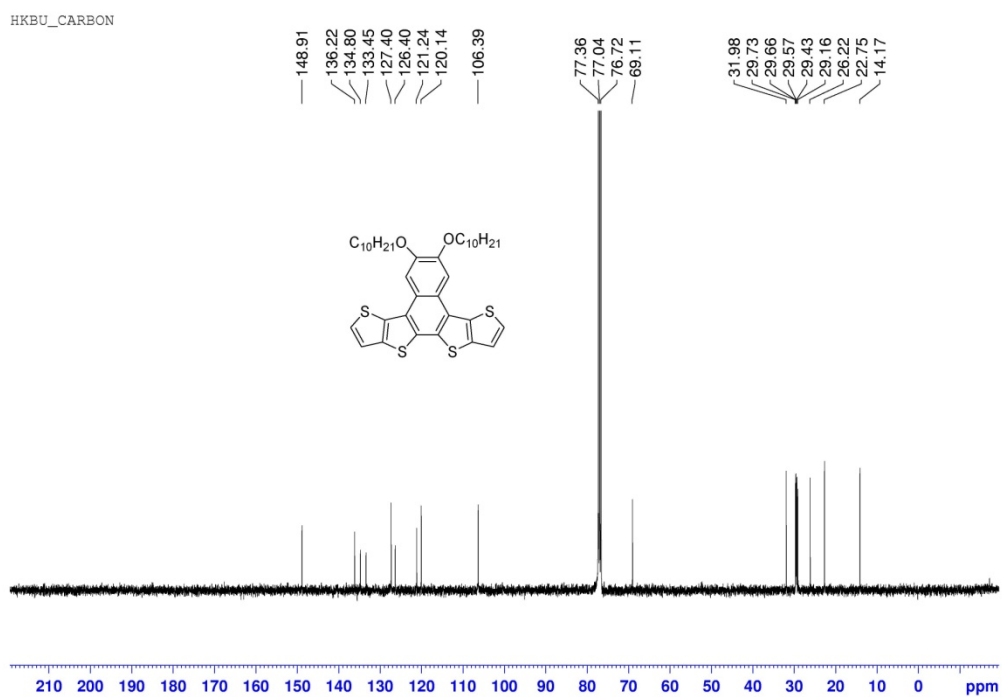<sup>13</sup>C NMR spectrum of the compound NDTT-10.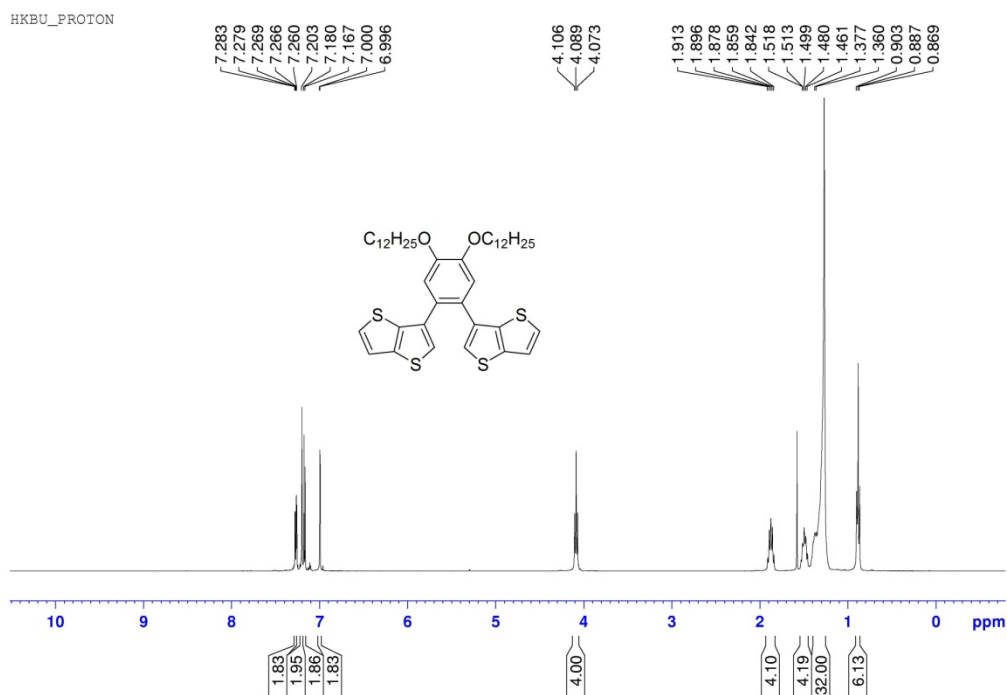

<sup>1</sup>H NMR spectrum of the compound **2d**.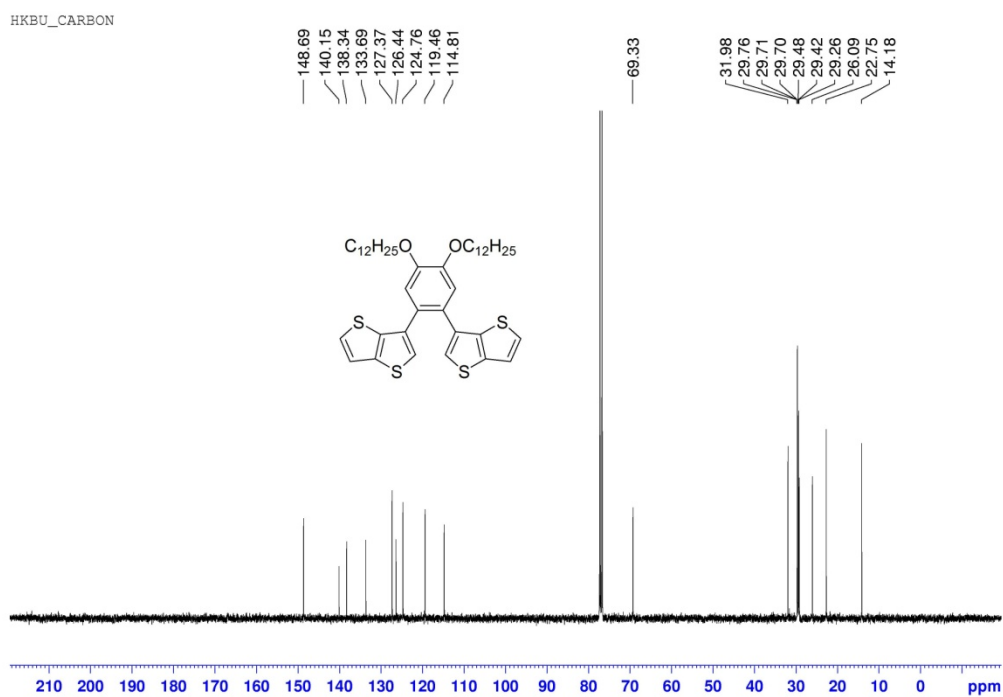<sup>13</sup>C NMR spectrum of the compound **2d**.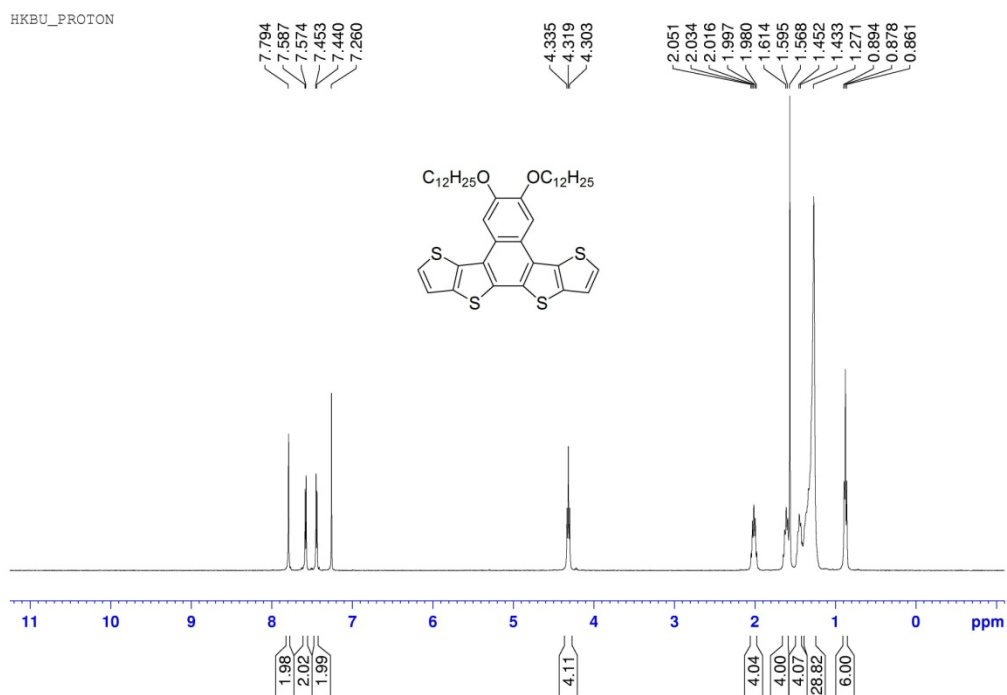

<sup>1</sup>H NMR spectrum of the compound **NDTT-12**.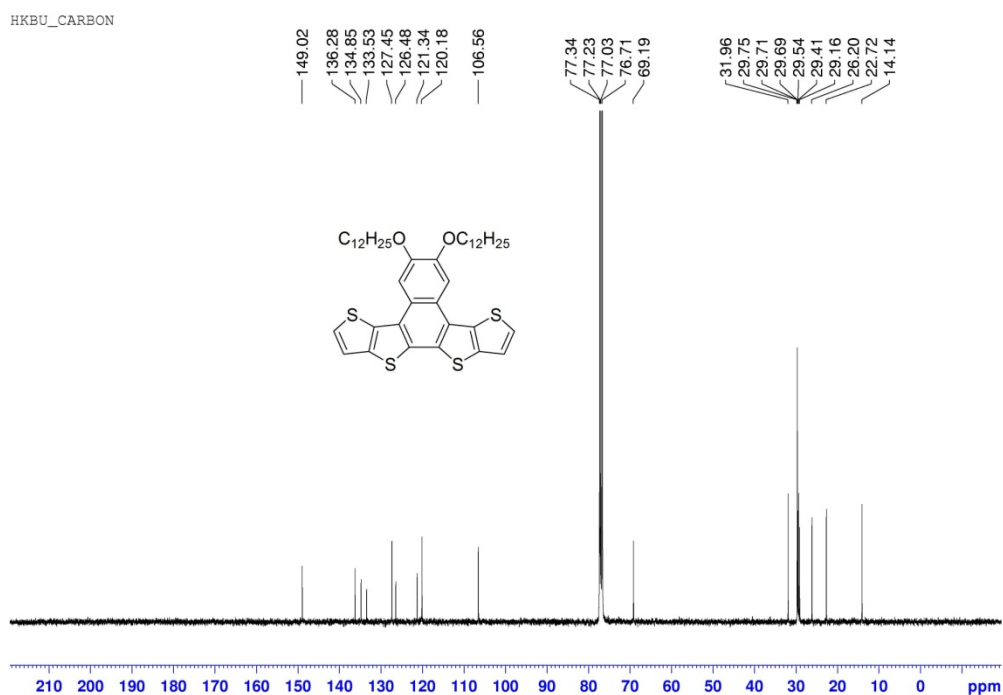<sup>13</sup>C NMR spectrum of the compound **NDTT-12**.

The MS spectra of the compounds **NDTT-n** (n = 1, 6, 10, and 12) are shown as follows.

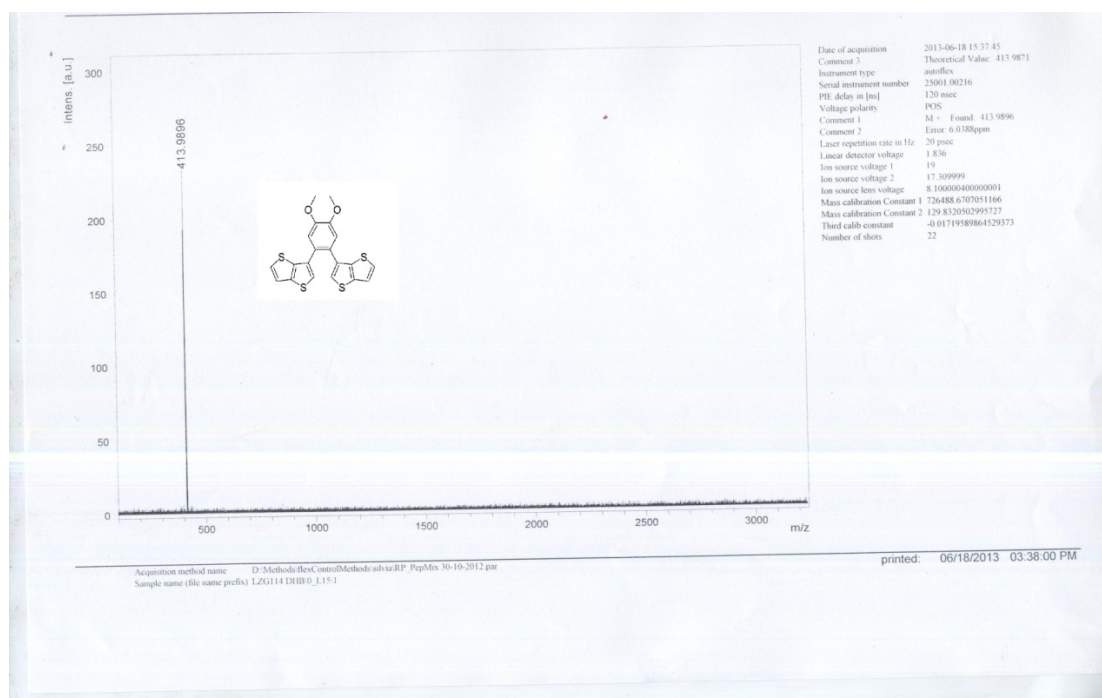

The MS spectrum of the compound **2a**.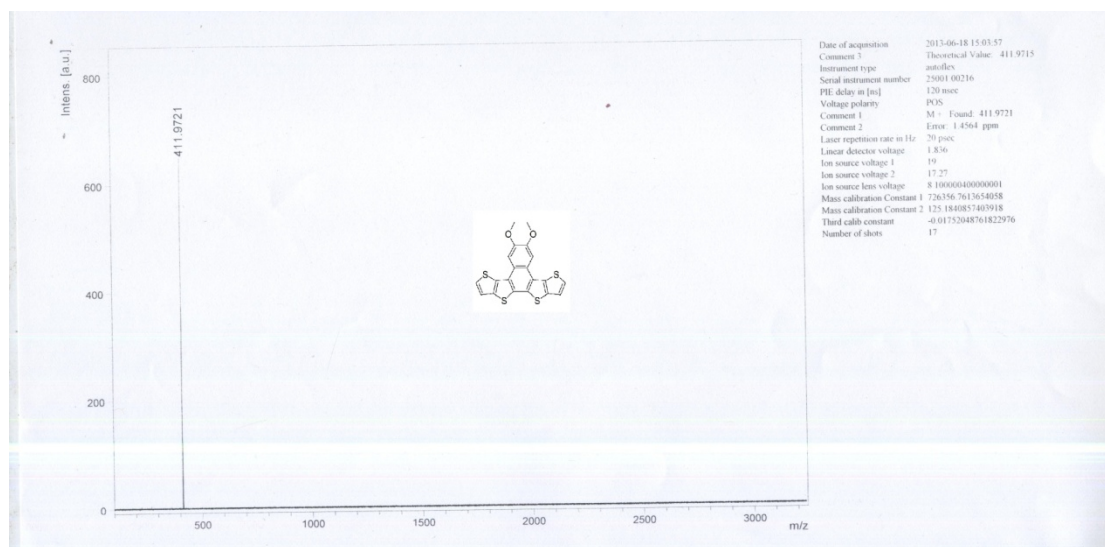The MS spectrum of the compound **NDTT-1**.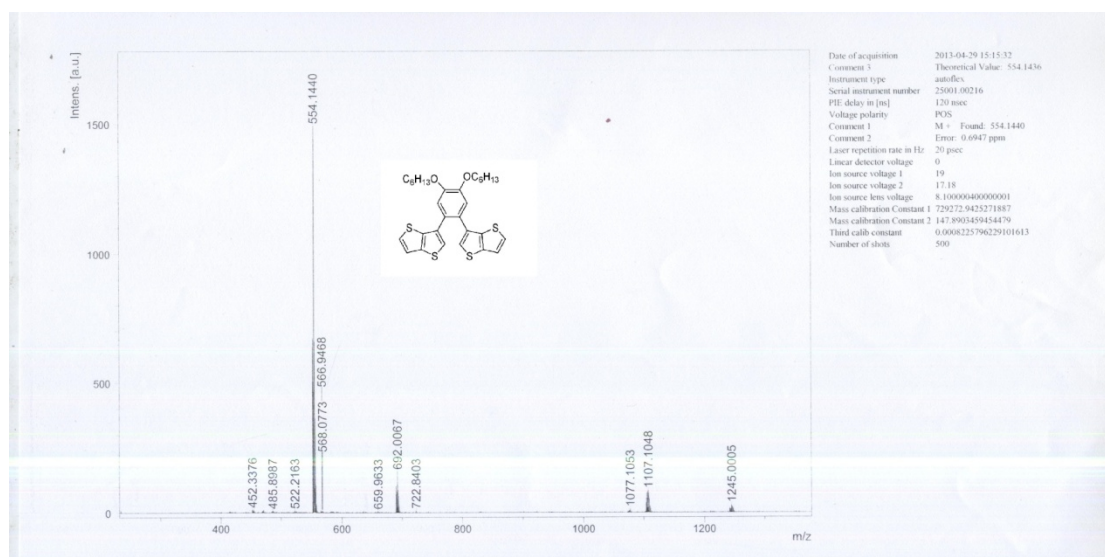The MS spectrum of the compound **2b**.



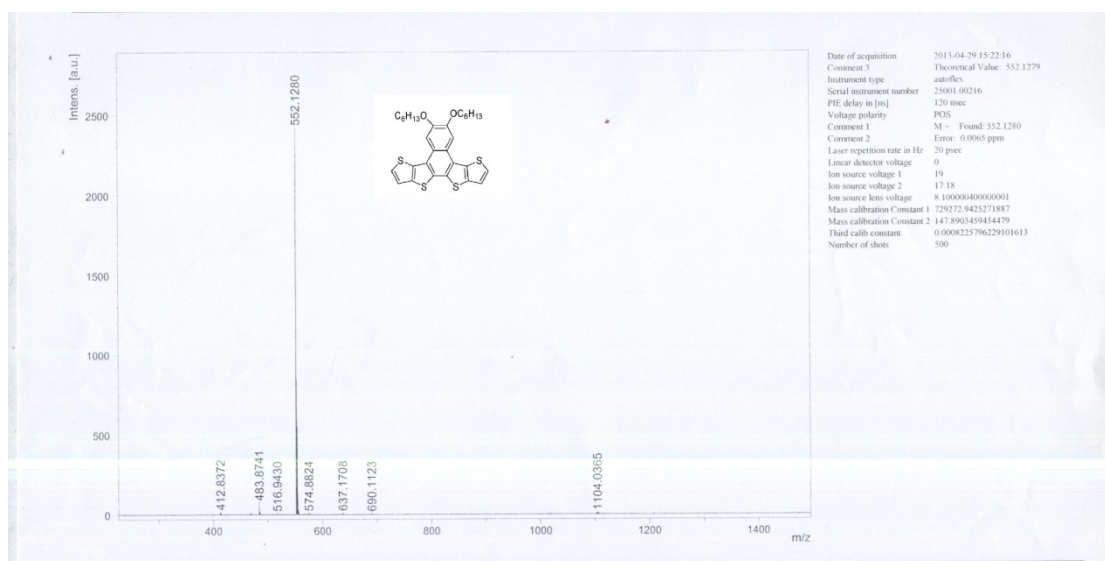

The MS spectrum of the compound NDTT-6.

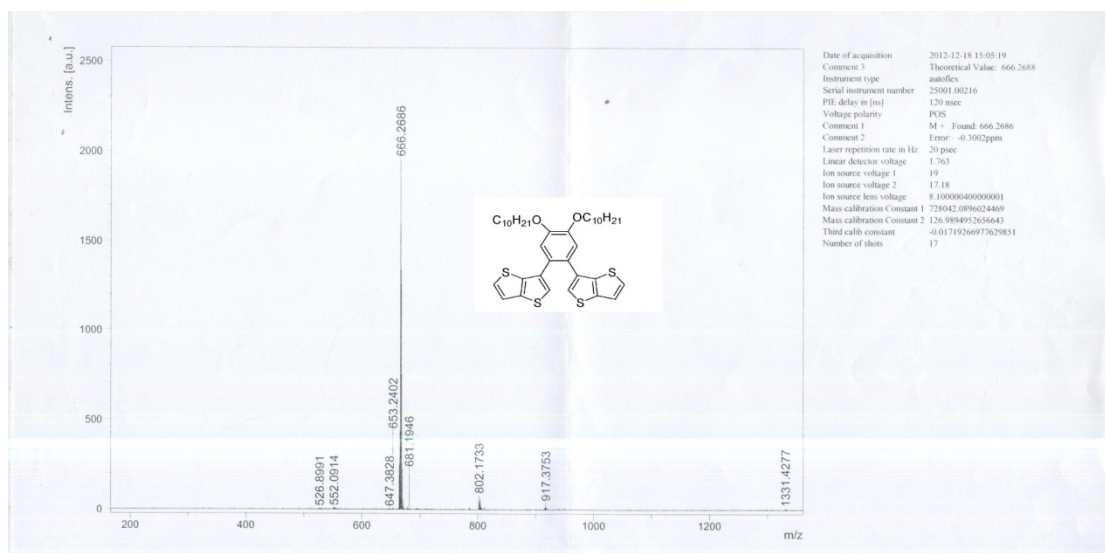

The MS spectrum of the compound 2c.

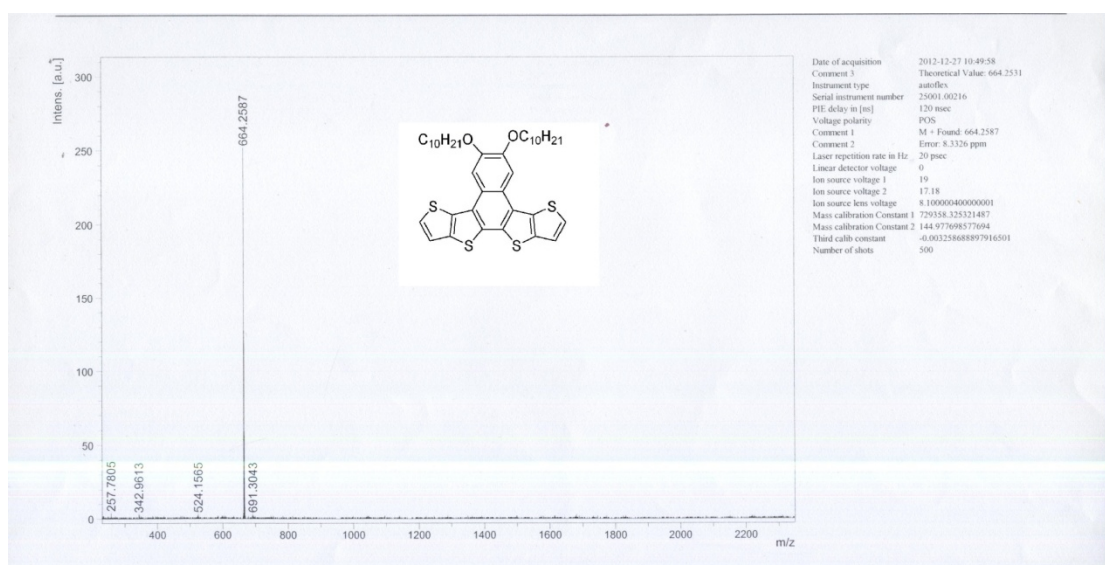



The MS spectrum of the compound NDTT-10.

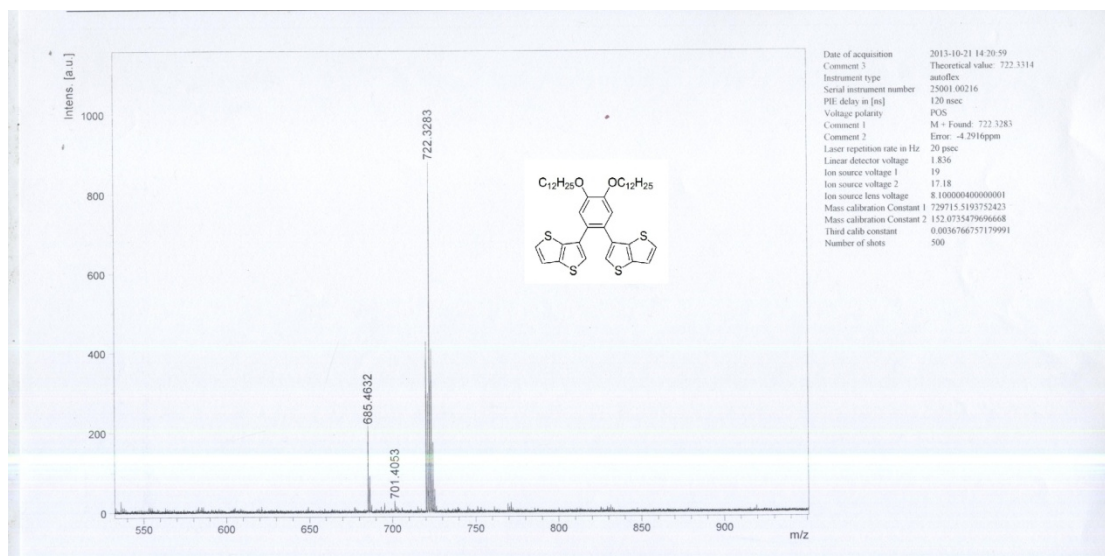

The MS spectrum of the compound 2d.

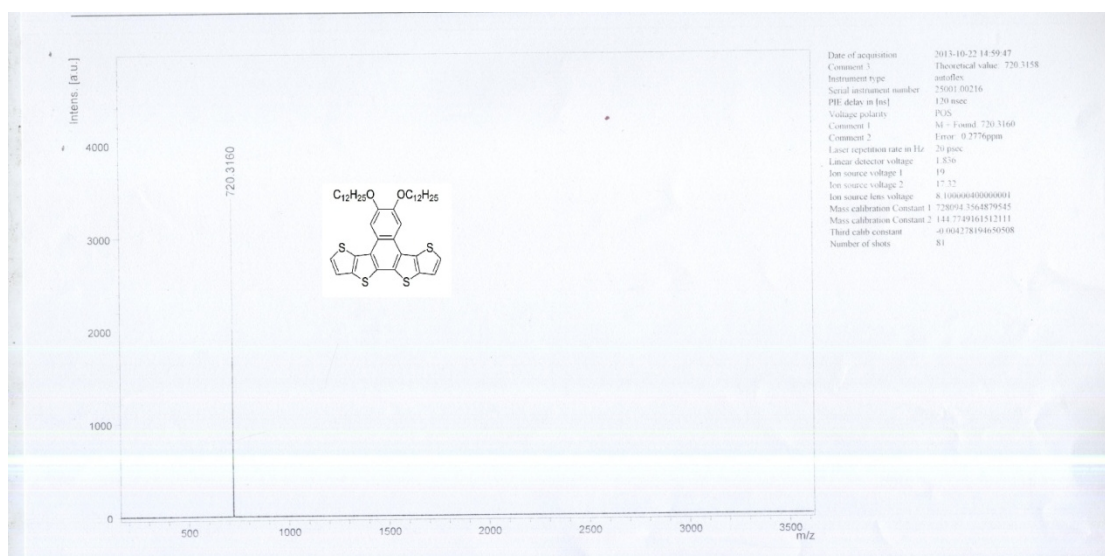

The MS spectrum of the compound NDTT-12.

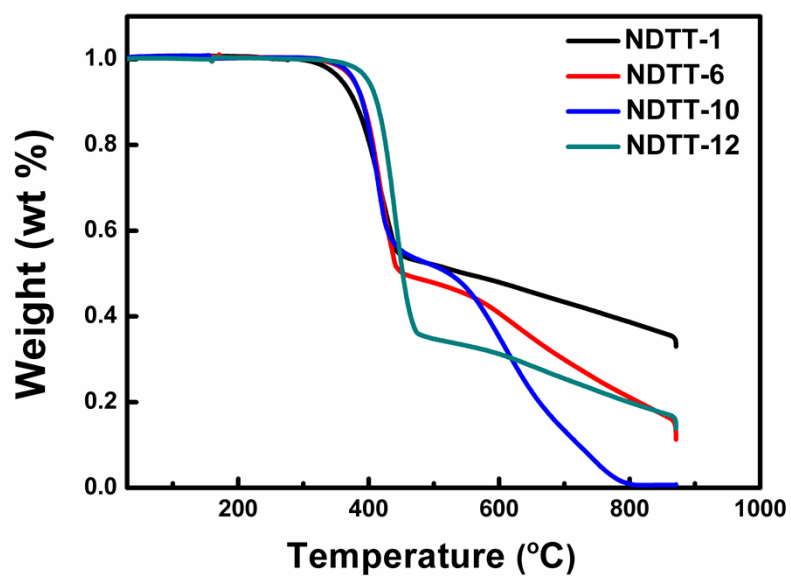

Fig. S1. Thermogravimetric analysis curves of the compounds **NDTT-n** ( $n = 1, 6, 10,$  and  $12$ ).

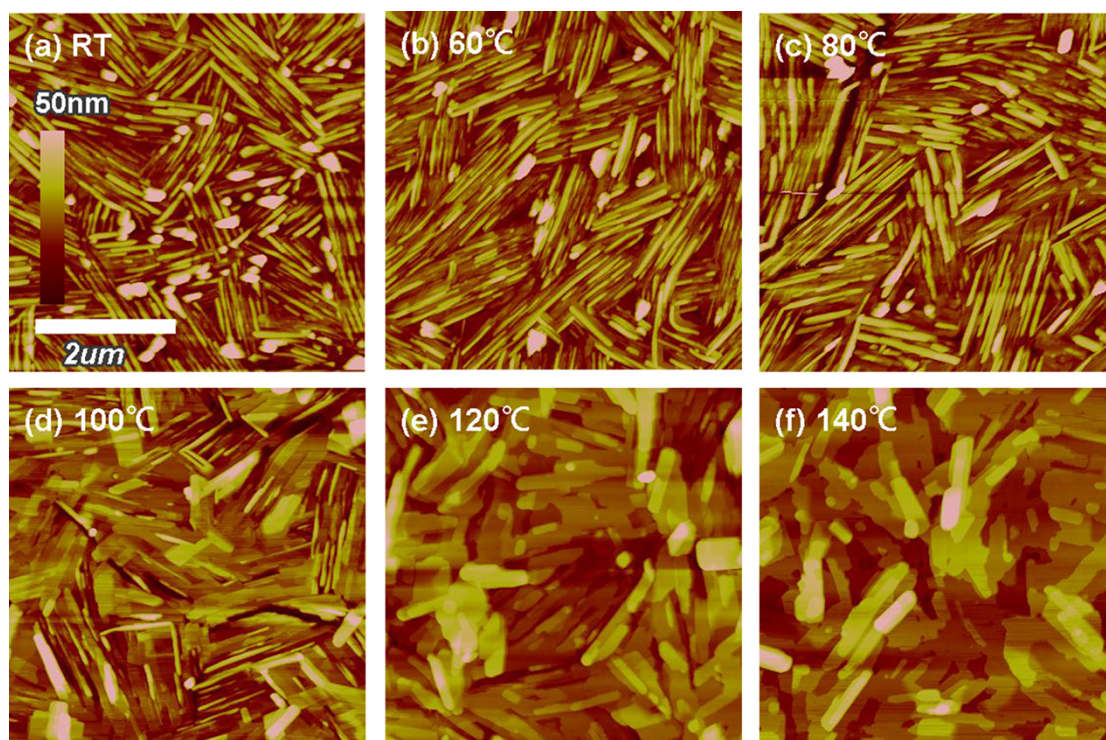

Fig. S2. AFM images of the **NDTT-12** thin film under different annealing temperature: (a) RT, (b) 60, (c) 80, (d) 100, (e) 120, (f) 140 °C.

**Table S1.** Diffraction peaks (degree) of the **NDTT-10** and **NDTT-12** thin film under different annealing temperature.

| Compd          | Annealing temperature[°C] |       |       |       |       |       | d-spacing<br>[nm]      |
|----------------|---------------------------|-------|-------|-------|-------|-------|------------------------|
|                | RT                        | 60    | 80    | 100   | 120   | 140   |                        |
| <b>NDTT-10</b> | 4.44                      | 4.44  | 4.46  | 4.40  | 4.44  | 4.38  | <b>1.99</b>            |
|                | 8.76                      | 8.78  | 8.80  | 8.72  | 8.70  | 8.70  |                        |
|                | 13.10                     | 13.12 | 13.12 | 13.04 | 13.02 | 13.02 |                        |
|                | 17.44                     | 17.46 | 17.48 | 17.36 | 17.34 | 17.36 |                        |
|                | 21.82                     | 21.88 | 21.92 | 21.76 | 21.68 | 21.72 |                        |
|                |                           |       |       |       | 5.44  | 5.48  | <b>1.62</b>            |
|                |                           |       |       |       | 10.78 | 10.86 |                        |
|                |                           |       |       |       | 6.46  | 6.56  | <b>Polycrystalline</b> |
|                |                           |       |       |       | 15.22 | 15.18 |                        |
|                |                           |       |       |       | 19.50 | 19.52 |                        |
| <b>NDTT-12</b> | 4.02                      | 4.02  | 4.04  | 4.02  | 4.02  | 4.00  | <b>2.20</b>            |
|                | 7.92                      | 7.92  | 7.94  | 7.92  | 7.86  | 7.90  |                        |
|                | 11.82                     | 11.86 | 11.84 | 11.8  | 11.78 | 11.78 |                        |
|                | 15.72                     | 15.78 | 15.74 | 15.70 | 15.66 | 15.68 |                        |
|                | 19.68                     | 19.72 | 19.70 | 19.66 | 19.54 | 19.6  |                        |
|                |                           |       |       |       |       |       |                        |

---

|  |       |       |                        |
|--|-------|-------|------------------------|
|  | 9.80  | 9.84  |                        |
|  | 13.66 | 13.72 |                        |
|  | 17.54 | 17.64 | <b>Polycrystalline</b> |
|  | 21.34 | 21.56 |                        |
|  | 28.44 | 28.44 |                        |

---
